# Supplementary material for: Automated Analysis of Lymphocytic Infiltration, Tumor Budding, and Their Spatial Relationship Improves Prognostic Accuracy in Colorectal Cancer
Source: Oxford University Press journal article supplement (doi:10.1158/2326-6066.cir-18-0377), 2019-03-07
Supplement: 23266066cir180377-sup-203245_2_supp_5279187_pljgpg.docx [file 23266066cir180377-sup-203245_2_supp_5279187_pljgpg.docx]

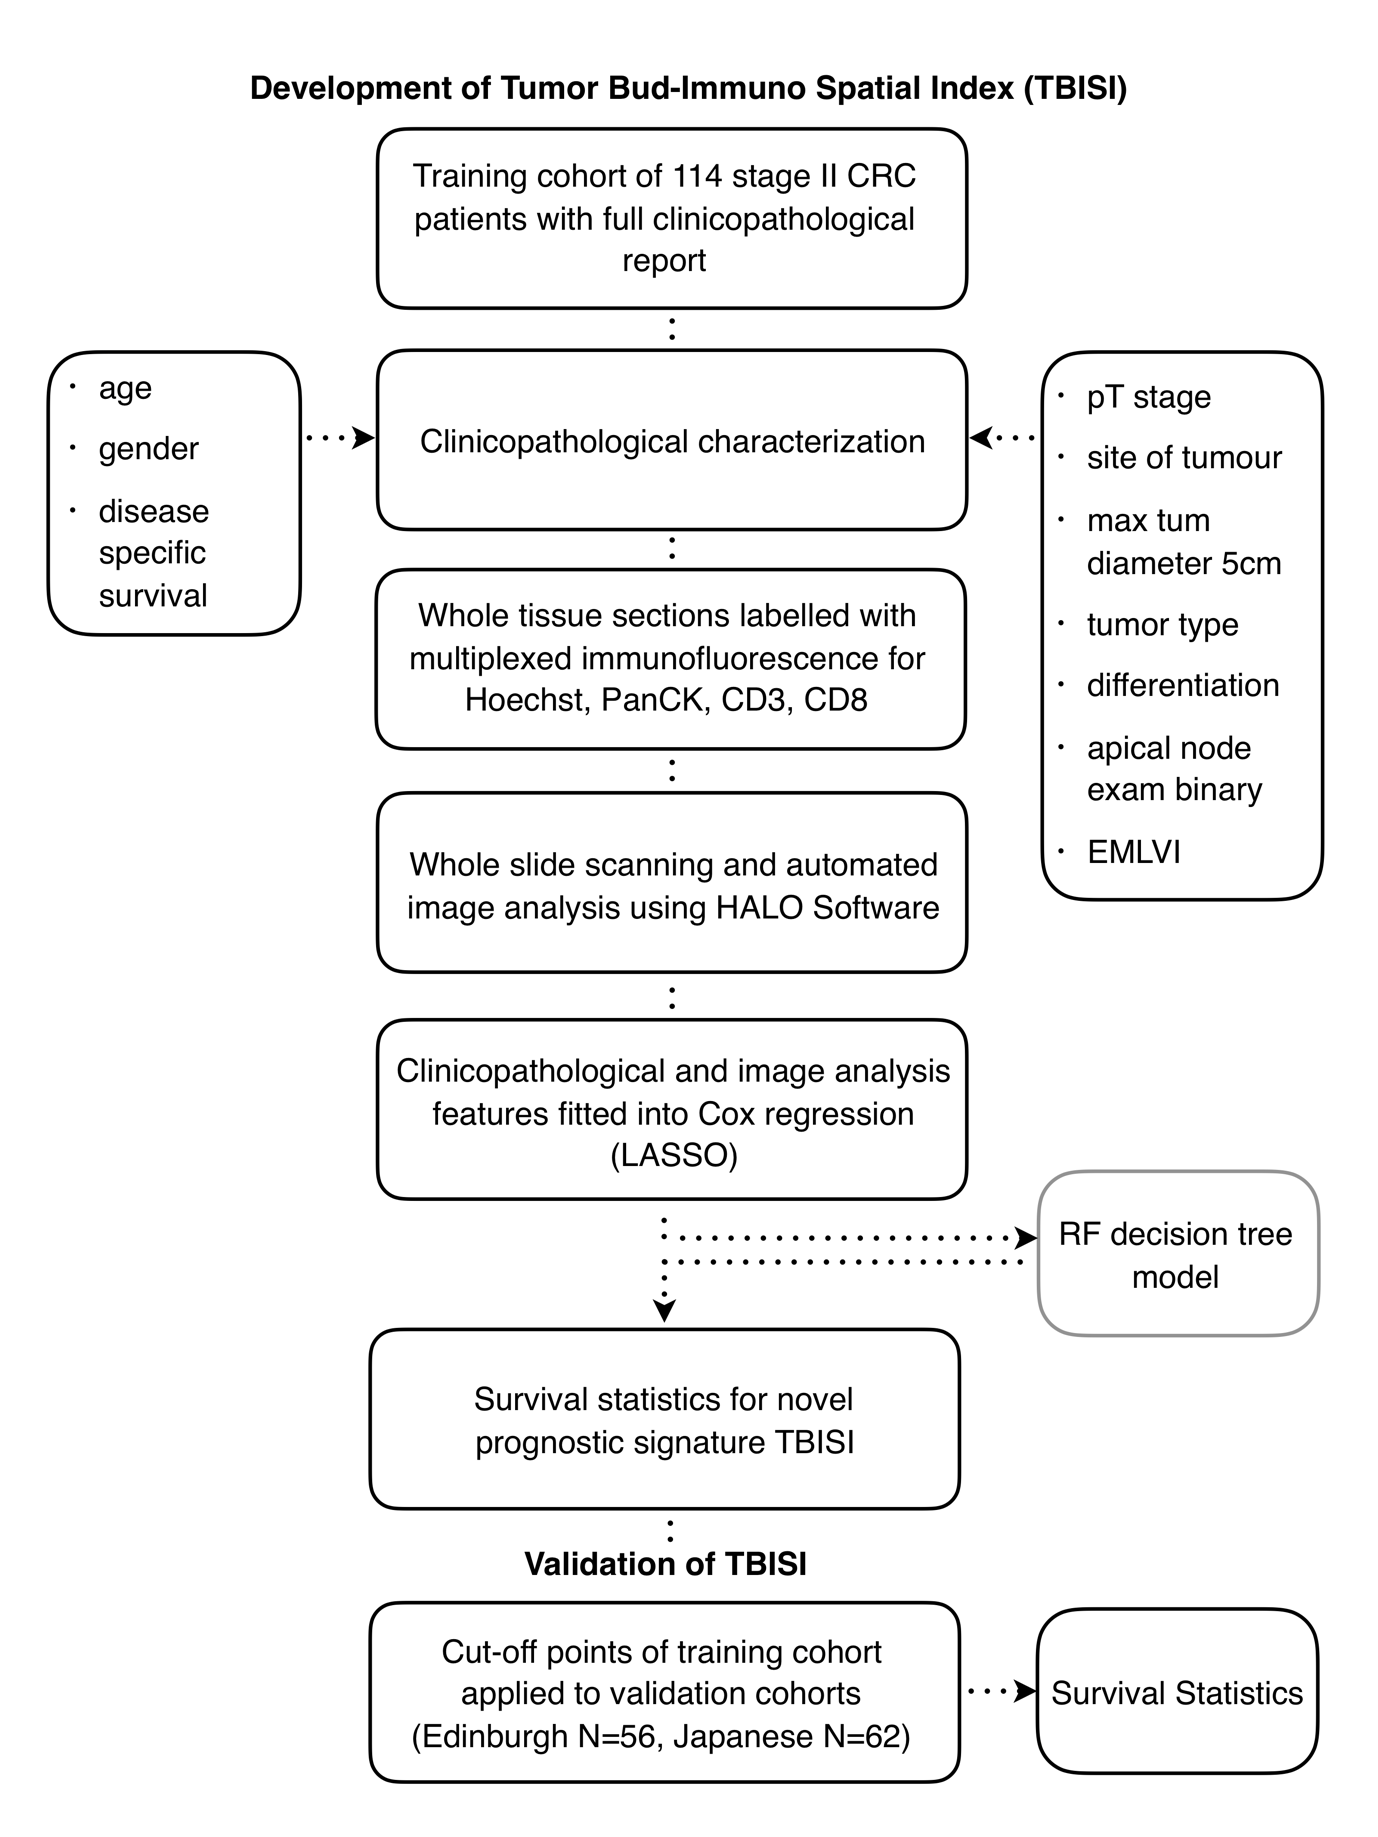
**Supplementary Figure 1. Study Design Workflow**


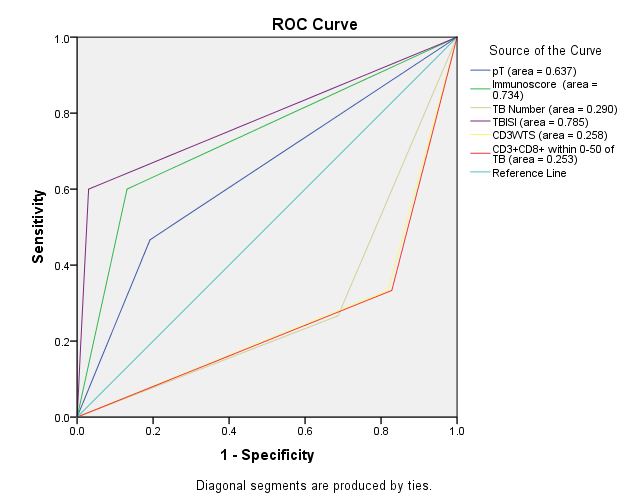


**Supplementary Figure 2. ROC curves for pT stage Immunoscore and the components of the Tumor Bud-Immuno Spatial Index for the training cohort.**

**Supplementary Table 1:** Cut-off values for image analysis features. IM = invasive margin, CT = tumour core, WTS = whole tumor section, TB = tumour bud.

| **Feature** | **Cut-off value** |
| --- | --- |
| **CD3⁺ density (cells/mm²) in IM** | 319.8922 |
| **CD3⁺ density (cells/mm²) in CT** | 354.4024 |
| **CD3⁺ density (cells/mm²) in WTS** | 389.6020 |
| **CD8⁺ density (cells/mm²) in IM** | 308.5554 |
| **CD8⁺ density (cells/mm²) in CT** | 114.6642 |
| **CD8⁺ density (cells/mm²) in WTS** | 182.1744 |
| **TB.Number** | 1104.0000 |

| **Features from clinicopathological report** | **Univariate Cox Regression** | | | |
| --- | --- | --- | --- | --- |
| **HR** | **95% CI** | | **p Value** |
|  | **Lower** | **Upper** |  |
|  |  |  |  |  |
| **Age** | 1.466 | 0.782 | 2.747 | 0.233 |
|  |  |  |  |  |
| **Gender** | 0.851 | 0.308 | 2.347 | 0.755 |
|  |  |  |  |  |
| **pT** | **4.143** | **1.480** | **11.570** | **0.006** |
|  |  |  |  |  |
| **Site of Tumor** | 0.663 | 0.337 | 1.305 | 0.234 |
|  |  |  |  |  |
| **Differentiation** | 2.025 | 0.968 | 4.238 | 0.061 |
|  |  |  |  |  |
| **Max tum diameter 5cm** | 1.224 | 0.411 | 3.646 | 0.716 |
|  |  |  |  |  |
| **Apical Node exam binary** | 0.366 | 0.082 | 1.641 | 0.189 |
|  |  |  |  |  |
| **EMLVI** | 0.342 | 0.117 | 1.000 | 0.050 |
|  |  |  |  |  |
| **Tumor Type** | 4.606e-08 | 0 | Inf | 0.998 |
|  |  |  |  |  |
| **Features from image analysis** |  |  |  |  |
|  |  |  |  |  |
| **CD3+ density in IM** | **0.997** | **0.995** | **0.999** | **0.0023** |
|  |  |  |  |  |
| **CD3+ density in CT** | **0.994** | **0.991** | **0.998** | **0.0003** |
|  |  |  |  |  |
| **CD3+ density in WTS** | **0.995** | **0.993** | **0.998** | **0.0005** |
|  |  |  |  |  |
| **CD8+ density in IM** | **0.997** | **0.995** | **1.000** | **0.0253** |
|  |  |  |  |  |
| **CD8+ density in CT** | **0.997** | **0.994** | **1.000** | **0.0231** |
|  |  |  |  |  |
| **CD8+ density in WTS** | **0.997** | **0.994** | **1.000** | **0.0187** |
|  |  |  |  |  |
| **Ratio of CD3+ to CD8+ densities in IM** | 1.132 | 0.819 | 1.565 | 0.4515 |
|  |  |  |  |  |
| **Ratio of CD3+ to CD8+ densities in CT** | 0.982 | 0.862 | 1.120 | 0.7842 |
|  |  |  |  |  |
| **Ratio of CD3+ to CD8+ densities in WTS** | 0.991 | 0.827 | 1.189 | 0.9245 |
|  |  |  |  |  |
| **TB Number** | **1.001** | **1.000** | **1.001** | **0.0004** |
|  |  |  |  |  |
| **TB Density** | **1.030** | **1.000** | **1.060** | **0.0446** |
|  |  |  |  |  |
| **CD3+ number within 0-50μm of TB** | 0.999 | 1.000 | 1.000 | 0.3686 |
|  |  |  |  |  |
| **Mean CD3+ number within 0-50μm of TB** | **0.651** | **0.481** | **0.881** | **0.0054** |
|  |  |  |  |  |
| **CD3+ number within 0-100μm of TB** | 0.999 | 1.000 | 1.000 | 0.1590 |
|  |  |  |  |  |
| **Mean CD3+ number within 0-100μm of TB** | **0.830** | **0.737** | **0.936** | **0.0023** |
|  |  |  |  |  |
| **CD8+ number within 0-50μm of TB** | 0.999 | 1.000 | 1.000 | 0.2266 |
|  |  |  |  |  |
| **Mean CD8+ number within 0-50μm of TB** | **0.601** | **0.405** | **0.892** | **0.0115** |
|  |  |  |  |  |
| **CD8+ number within 0-100μm of TB** | 0.999 | 1.000 | 1.000 | 0.1495 |
|  |  |  |  |  |
| **Mean CD8+ number within 0-100μm of TB** | **0.851** | **0.751** | **0.966** | **0.0122** |
|  |  |  |  |  |
| **CD3+CD8+ number within 0-50μm of TB** | 0.999 | 1.000 | 1.000 | 0.2534 |
|  |  |  |  |  |
| **Mean CD3+CD8+ number within 0-50μm of TB** | **0.765** | **0.639** | **0.915** | **0.0033** |
|  |  |  |  |  |
| **CD3+CD8+ number within 0-100μm of TB** | 1.000 | 1.000 | 1.000 | 0.1144 |
|  |  |  |  |  |
| **Mean CD3+CD8+ number within 0-100μm of TB** | **0.904** | **0.847** | **0.964** | **0.0022** |

**Supplementary Table 2: Univariate Cox-regression analysis for patient clinicopathological and all image analysis data of training cohort.** Significant features (p < 0.05) are shown in bold. HR = hazard ratio, CI = confidence interval, EM LVI = Extramural lymphovascular invasion, IM = invasive margin, CT = tumour core, WTS = whole tumor section, TB = tumor bud.

| **Feature** | **CD3_Cells_IM** | **CD3_Cells_CT** | **T_CD3_Cells** | **CD8_Cells_IM** | **CD8_Cells_CT** | **T_CD8_Cells** | **TB.Number** |
| --- | --- | --- | --- | --- | --- | --- | --- |
| **CD3_Cells_IM** | NA | 0.000154 | 1.59 x 10-16 | 3.11 x 10-11 | 2.62 x 10-06 | 5.90 x 10-09 | 0.015960 |
| **CD3_Cells_CT** | 0.000154 | NA | 1.95 x 10-46 | 0.063281 | 0.067623 | 0.053506 | 0.811996 |
| **T_CD3_Cells** | 1.59 x 10-16 | 1.95 x 10-46 | NA | 3.59 x 10-05 | 0.000925 | 0.000116 | 0.492053 |
| **CD8_Cells_IM** | 3.11 x 10-11 | 0.063281 | 3.59 x 10-05 | NA | 4.44 x 10-27 | 1.30 x 10-51 | 0.037192 |
| **CD8_Cells_CT** | 2.62 x 10-06 | 0.067623 | 0.000925 | 4.44 x 10-27 | NA | 1.11 x 10-65 | 0.070321 |
| **T_CD8_Cells** | 5.90 x 10-09 | 0.053506 | 0.000116 | 1.30 x 10-51 | 1.11 x 10-65 | NA | 0.041066 |
| **TB.Number** | 0.01596 | 0.811996 | 0.492053 | 0.037192 | 0.070321 | 0.041066 | NA |

**Supplementary Table 3:** P values of association between tumour buds and lymphocytic infiltration pattern distributions. CD3_Cells_IM = CD3+ density at the invasive margin, CD3_Cells_CT = CD3+ density at the tumour core, T_CD3_Cells = CD3+ density at the whole tumour section, CD8_Cells_IM = CD8+ density at the invasive margin, CD8_Cells_CT = CD8+ density at the tumour core , T_CD8_Cells = CD8+ density at the whole tumour section, TB.Number = Tumour Bud Number.

| **Variables in the equation** | **Multivariate Cox Regression Model** | | | |
| --- | --- | --- | --- | --- |
| **HR** | **95% CI** | | **P Value** |
|  | **Lower** | **Upper** |  |
| Tumor Bud-Immuno spatial index | 18.755 | 6.462 | 54.434 | 6.963 x 10-8 |
| **Variables not in equation** | | | | |
| pT stage |  |  |  | NS |
| Immunoscore |  |  |  | NS |
| TB Number |  |  |  | NS |

**Supplementary Table 4: Features entered into the multivariate forward stepwise cox regression.** Features which add significance (on the top half of table) and features which do not add (on the bottom half of the table) to an integrative model to predict disease specific death. HR = hazard ratio, CI = confidence interval, TB= Tumor Bud, NS = Non-significant.
