# Supplementary material for: Automated Analysis of Lymphocytic Infiltration, Tumor Budding, and Their Spatial Relationship Improves Prognostic Accuracy in Colorectal Cancer
Source: Oxford University Press journal article supplement (doi:10.1158/2326-6066.cir-18-0377), 2019-03-07
Supplement: 23266066cir180377-sup-203245_2_supp_5289245_pljgpj.docx [file 23266066cir180377-sup-203245_2_supp_5289245_pljgpj.docx]

**Supplementary Figure Legends:**

**Supplementary Figure 1. Study Design Workflow**

**Supplementary Figure 2. ROC curves for pT stage Immunoscore and the components of the Tumor Bud-Immuno Spastial Index for the training cohort.**
